# Supplementary material for: Two novel metal–organic frameworks based on pyridyl-imidazole-carboxyl multifunctional ligand: selective CO2 capture and multiresponsive luminescence sensor
Source: Royal Society of Chemistry journal article supplement (doi:10.1039/c9dt01430f), 2019-01-01
Supplement: c9dt01430f1.pdf [file c9dt01430f1.pdf]

# Two Novel Metal-Organic Frameworks Based on Pyridyl-Imidazole-Carboxyl Multifunctional Ligand: Selective CO<sub>2</sub> Capture and Multiresponsive Luminescence Sensor

Dou-Dou Feng <sup>a</sup>, Yu-Di Zhao<sup>a</sup>, Xiao-Qing Wang<sup>\*a</sup>, Dong-Dong Fang<sup>a</sup>, Jing Tang<sup>a</sup>, Li-Ming Fan<sup>a</sup> and Jie Yang <sup>\*b</sup>

*a.* North University of China, Tai Yuan, P. R. China. E-mail; xqwang@nuc.edu.cn;

*b.* Liaocheng University, Liaocheng, P. R. China. E-mail; yangjie\_lcu@126.com

## The single-site Langmuir-Freundlich model for CO<sub>2</sub> and CH<sub>4</sub> adsorption isotherms

In order to compare the efficiency of complex **1** for CO<sub>2</sub>/CH<sub>4</sub> and CO<sub>2</sub>/N<sub>2</sub> separation, we used the IAST of Myers and Prausnitz along with the pure component isotherm fits to determine the molar loadings in the mixture for specified partial pressures in the bulk gas phase. The measured experimental data on pure component isotherms for CO<sub>2</sub> and CH<sub>4</sub>, in terms of excess loadings, were first converted to absolute loading using the Peng-Robinson equation of state for estimation of the fluid densities. The absolute component loadings at 273 K were fitted with a single-site Langmuir-Freundlich model (Equation 1).

$$N = a \times \frac{bp^c}{1+bp^c} \quad (1)$$

Here, *a* is saturation capacity and *b* and *c* are constant. The fitting parameters of equation 1 as well as the correlation coefficients (*R*<sup>2</sup>) are listed in Table S2.

**Table S1** Selected bond lengths (Å) and angles (°) for complexes **1-2**.

|                       |           |                       |           |
|-----------------------|-----------|-----------------------|-----------|
| Mn1—O2 <sup>i</sup>   | 2.163 (5) | Mn1—O1                | 2.187 (5) |
| Mn1—O2 <sup>ii</sup>  | 2.163 (5) | Mn1—N1 <sup>iv</sup>  | 2.217 (6) |
| Mn1—O1 <sup>iii</sup> | 2.187 (5) | Mn1—N1 <sup>v</sup>   | 2.217 (6) |
| O2—Mn1 <sup>vi</sup>  | 2.163 (5) | N1—Mn1 <sup>vii</sup> | 2.217 (6) |

|                                         |            |                                        |            |
|-----------------------------------------|------------|----------------------------------------|------------|
| C7—C10                                  | 1.485 (10) | C10—C11                                | 1.375 (10) |
| C7—C8                                   | 1.382 (10) | C5—C4                                  | 1.352 (10) |
| C7—C6                                   | 1.365 (11) | C5—C6                                  | 1.371 (11) |
| O2 <sup>ii</sup> —Mn1—O2 <sup>i</sup>   | 180.0 (3)  | O2 <sup>ii</sup> —Mn1—O1               | 93.0 (2)   |
| O2 <sup>ii</sup> —Mn1—O1 <sup>iii</sup> | 87.0 (2)   | O2 <sup>i</sup> —Mn1—O1 <sup>iii</sup> | 93.0 (2)   |
| O2 <sup>i</sup> —Mn1—O1                 | 87.0 (2)   | O2 <sup>ii</sup> —Mn1—N1 <sup>v</sup>  | 95.2 (2)   |
| O2 <sup>i</sup> —Mn1—N1 <sup>iv</sup>   | 95.2 (2)   | O1 <sup>iii</sup> —Mn1—O1              | 180.0      |
| O2 <sup>i</sup> —Mn1—N1 <sup>v</sup>    | 84.8 (2)   | O1 <sup>iii</sup> —Mn1—N1 <sup>v</sup> | 90.5 (2)   |
| O2 <sup>ii</sup> —Mn1—N1 <sup>iv</sup>  | 84.8 (2)   | O1—Mn1—N1 <sup>v</sup>                 | 89.5 (2)   |
| O1 <sup>iii</sup> —Mn1—N1 <sup>iv</sup> | 89.5 (2)   | N1 <sup>v</sup> —Mn1—N1 <sup>iv</sup>  | 180.0 (3)  |
| O1—Mn1—N1 <sup>iv</sup>                 | 90.5 (2)   | C1—N1—Mn1 <sup>vii</sup>               | 130.0 (5)  |

Symmetry codes: (i)  $x-1, y, z$ ; (ii)  $-x+1, -y, -z$ ; (iii)  $-x, -y, -z$ ; (iv)  $-x-1, y-1/2, -z+1/2$ ; (v)  $x+1, -y+1/2, z-1/2$ ; (vi)  $x+1, y, z$ ; (vii)  $-x-1, y+1/2, -z+1/2$ .

|                                       |             |             |           |
|---------------------------------------|-------------|-------------|-----------|
| Ag1—O1 <sup>i</sup>                   | 2.337 (3)   | N1—C1       | 1.369 (5) |
| Ag1—N1                                | 2.179 (3)   | C24—C12     | 1.485 (5) |
| Ag1—N5 <sup>ii</sup>                  | 2.179 (3)   | C24—C25     | 1.387 (5) |
| N3—C14                                | 1.343 (5)   | C24—C29     | 1.389 (5) |
| N3—C10                                | 1.345 (4)   | N5—C22      | 1.369 (5) |
| C18—C17                               | 1.381 (5)   | C11—C12     | 1.379 (5) |
| C18—C19                               | 1.373 (5)   | C11—C10     | 1.392 (5) |
| N4—C23                                | 1.352 (4)   | C13—C14     | 1.386 (5) |
| N4—C21                                | 1.369 (5)   | C13—C12     | 1.394 (5) |
| N1—Ag1—O1 <sup>i</sup>                | 111.95 (11) | C12—C11—C10 | 120.6 (4) |
| N1—Ag1—N5 <sup>ii</sup>               | 138.58 (13) | C10—C11—H11 | 119.7     |
| N5 <sup>ii</sup> —Ag1—O1 <sup>i</sup> | 109.06 (12) | C27—C26—H26 | 119.5     |
| C30—O1—Ag1 <sup>iii</sup>             | 116.7 (3)   | C19—C18—C17 | 119.6 (4) |
| C17—C18—N4                            | 120.1 (4)   | C26—C27—C30 | 121.4 (4) |

|                                                                                                   |           |             |           |
|---------------------------------------------------------------------------------------------------|-----------|-------------|-----------|
| C19—C18—N4                                                                                        | 120.3 (3) | C28—C27—C30 | 120.6 (4) |
| Symmetry codes: (i) $-x+1, y+3/2, -z+1/2$ ; (ii) $-x+2, -y+1, -z$ ; (iii) $-x+1, y-3/2, -z+1/2$ . |           |             |           |

**Table S2** Equation parameters for the single-site Langmuir-Freundlich model.

| Adsorbates      | a (mmol/g) | b (kPa <sup>-1</sup> ) | c     | R <sup>2</sup> |
|-----------------|------------|------------------------|-------|----------------|
| CO <sub>2</sub> | 4.11       | 0.0422                 | 0.728 | 0.99921        |
| N <sub>2</sub>  | 0.838      | 0.00228                | 1.04  | 0.9994         |
| CH <sub>4</sub> | 2.15       | 0.00902                | 0.973 | 0.99994        |

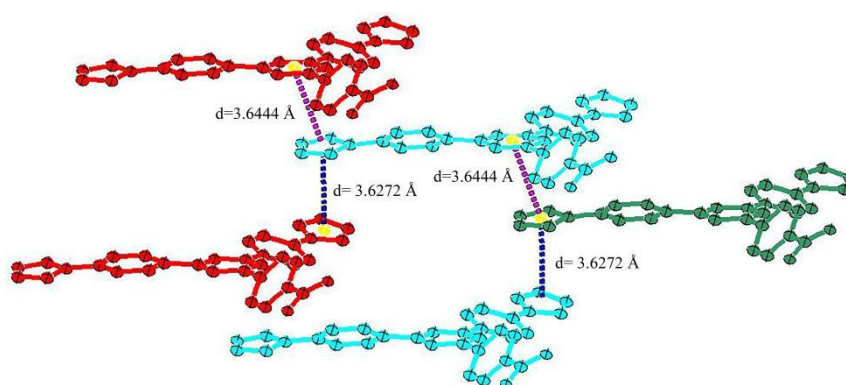

**Fig .S1** The  $\pi$ -stacking interaction of complex 2.

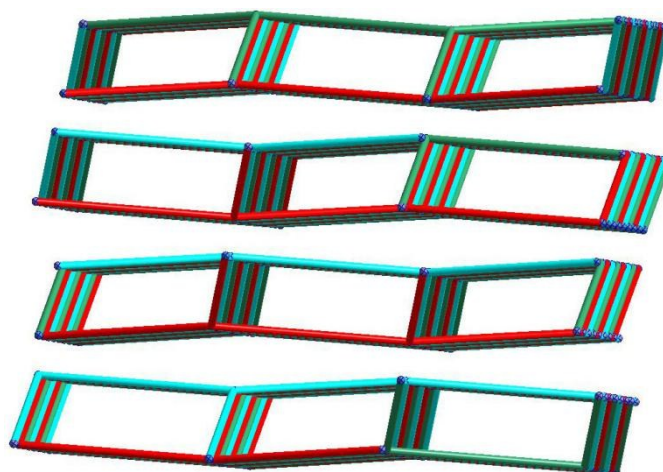

Fig .S2 The 3D supramolecular structure of complex 2.

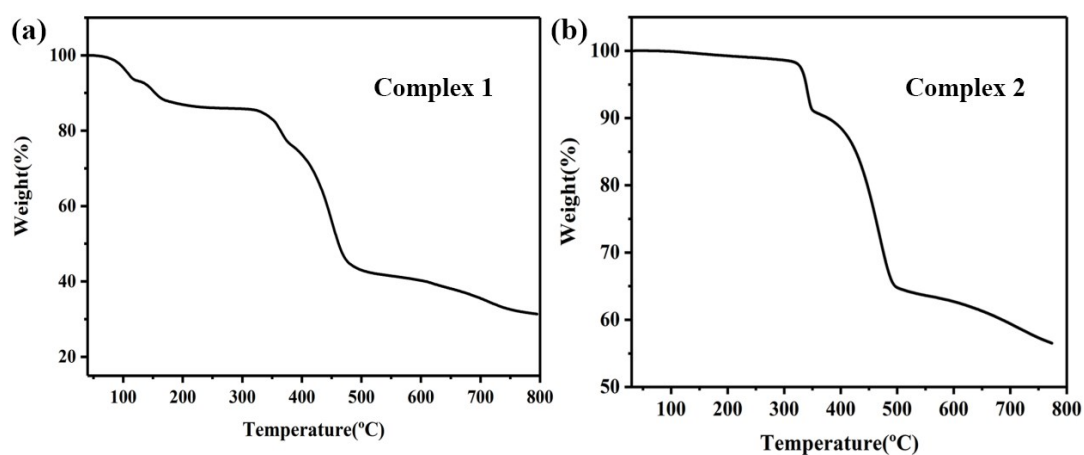

Fig .S3 (a) The TGA curve of complex 1; (b) The TGA curve of complex 2.

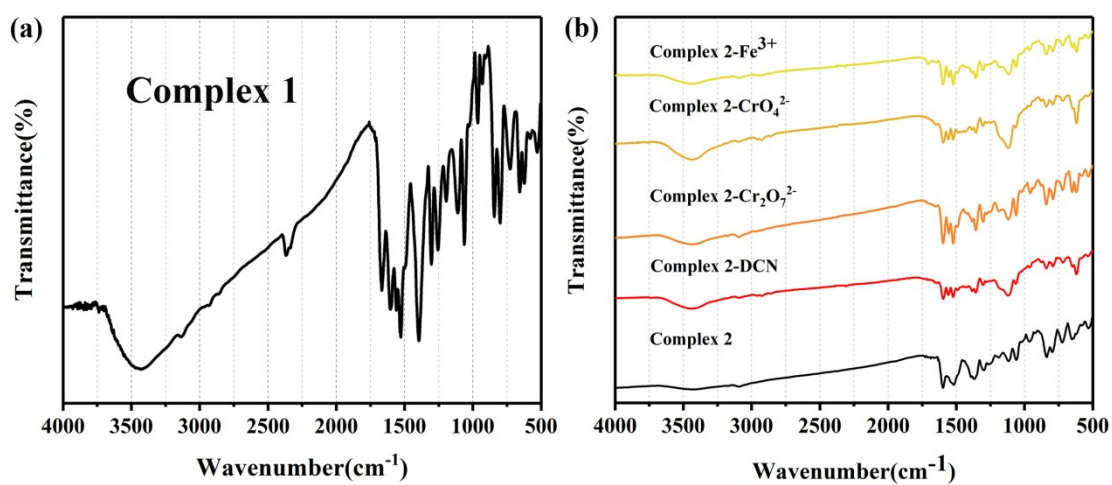

Fig .S4 (a) The IR of complex 1; (b) The IR of complex 2 before and after exposure to different

analytes.

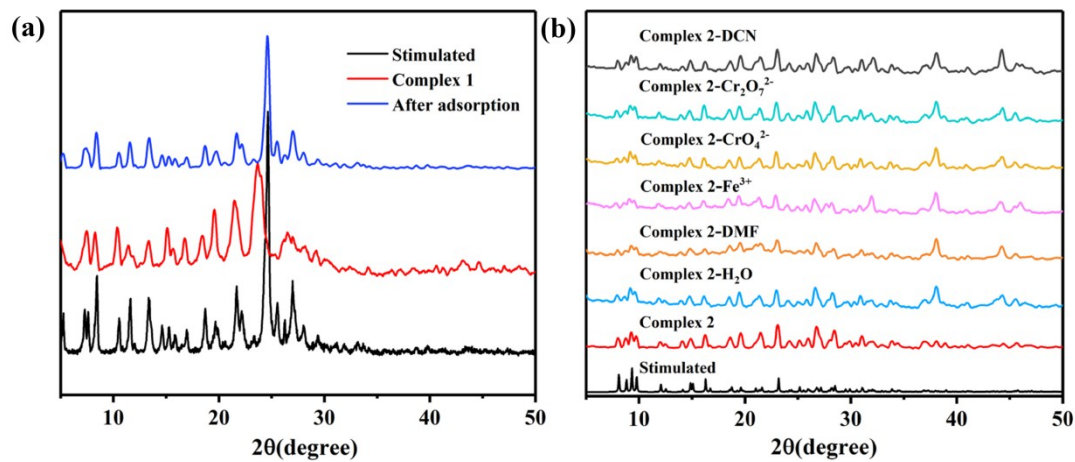

**Fig .S5 (a)**The PXRD patterns of complex 1, stimulated and 1a (after adsorption); **(b)**The PXRD patterns of complex 2 before and after exposure to different analytes.

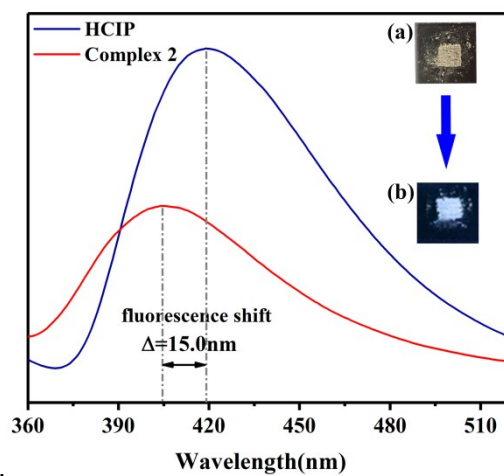

**Fig .S6** Photoluminescent emission spectrum of HCIP and 2 in the solid state with the excitation at 280 nm at room temperature. Insets show digital photograph of 2 in daylight **(a)** and 365 nm UV light **(b)**.

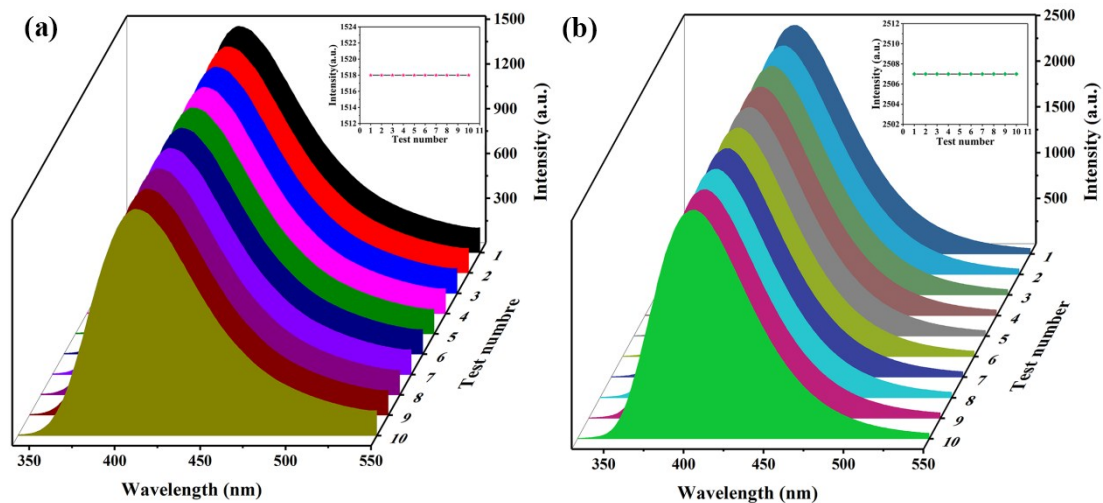

**Fig. S7** (a) The fluorescence intensity of **2** was measured 10 times in water; (b) The fluorescence intensity of **2** was measured 10 times in DMF.

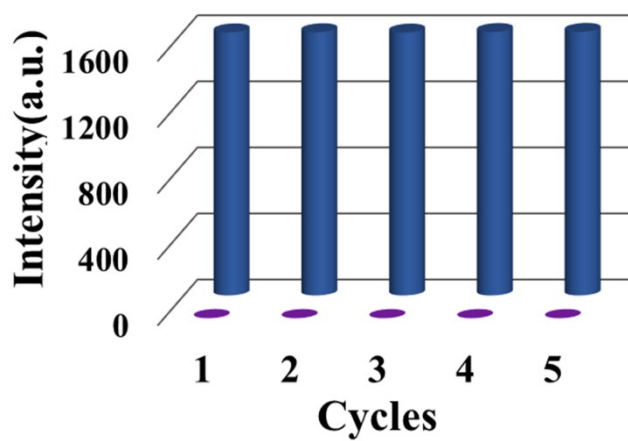

**Fig. S8** Photoluminescence intensity of complex **2** in five recyclable experiments for the  $\text{Fe}^{3+}$  in aqueous solution.

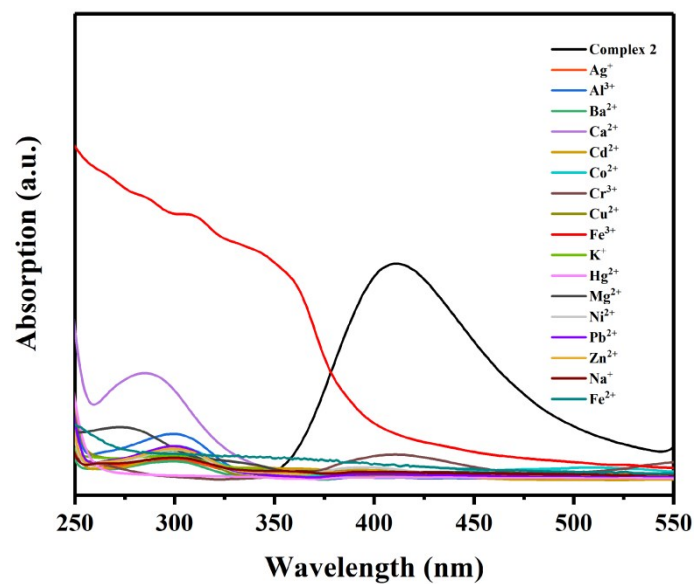

**Fig. S9** UV-Vis absorption spectra of various metal cations (0.01 M) aqueous solution. The emission spectra of complex **2** (black color) (2 mg) dispersed in water (2 mL) upon excitation of 280 nm.

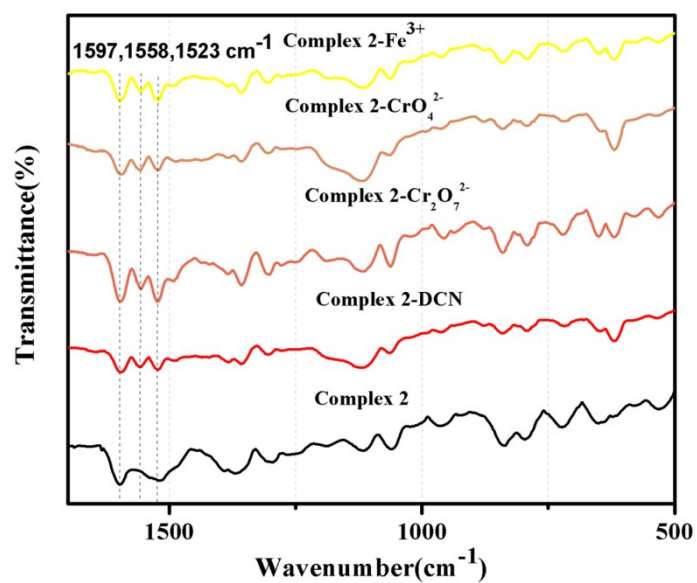

**Fig. S10** Changes of part IR for complex **2** before and after the sensing experiments.

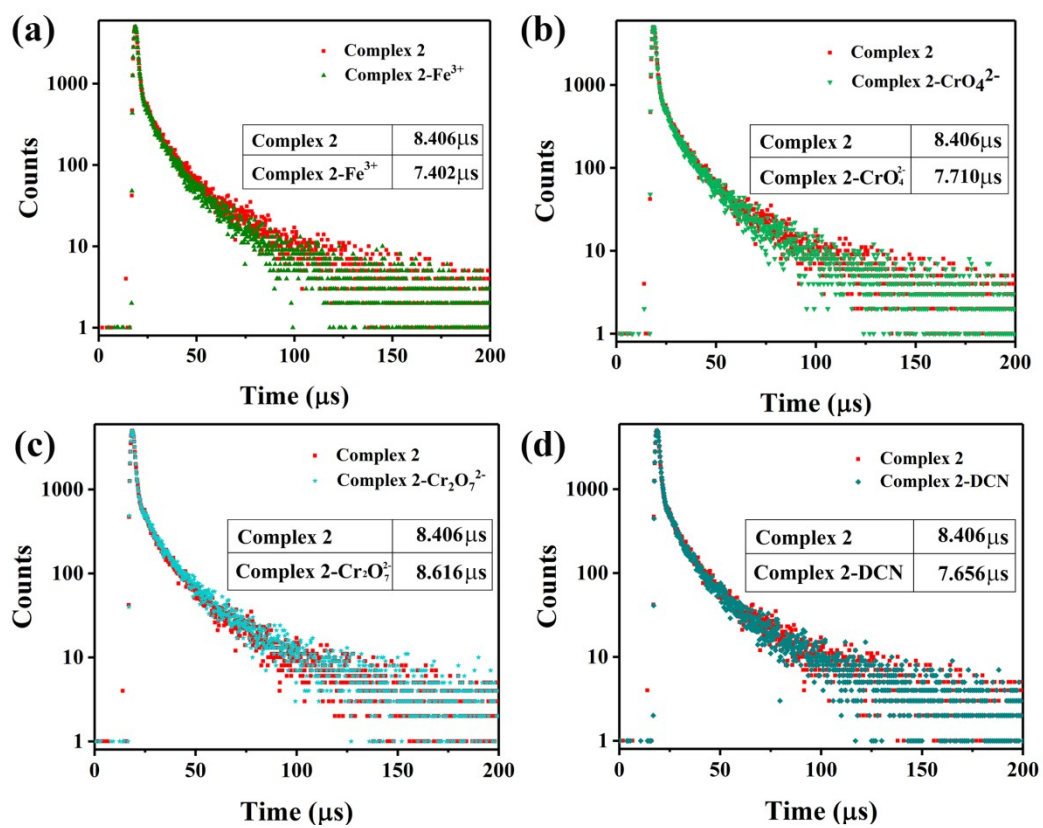

**Fig. S11** Lifetime decay profile of complex 2 before and after exposure to Fe<sup>3+</sup>(a),CrO<sub>4</sub><sup>2-</sup>(b), Cr<sub>2</sub>O<sub>7</sub><sup>2-</sup>(c), DCN(d).



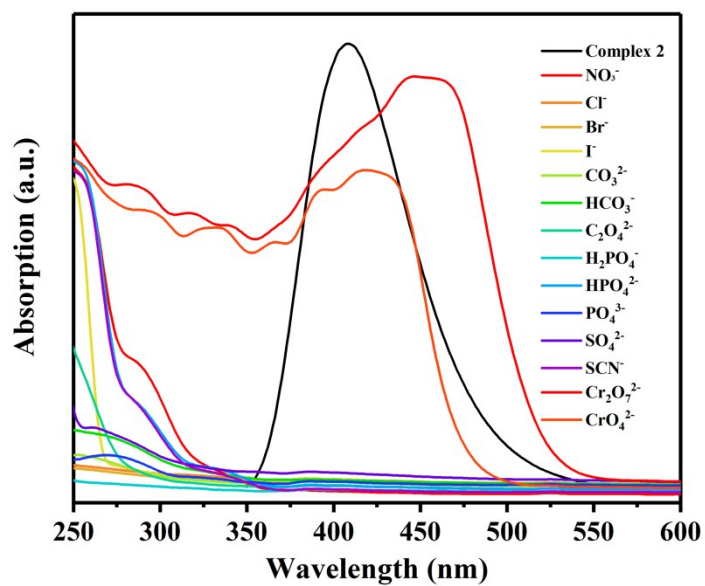

**Fig. S12** UV-Vis absorption spectra of various inorganic anions (0.01 M) aqueous solution. The emission spectra of complex **2** (black color) (2 mg) dispersed in aqueous solution (2 mL) upon excitation of 280 nm.

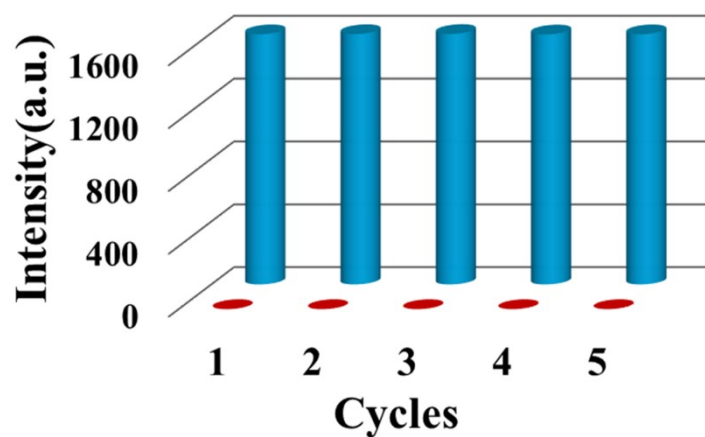

**Fig. S13** Photoluminescence intensity of complex **2** in five recyclable experiments for the  $\text{CrO}_4^{2-}$  in aqueous solution.

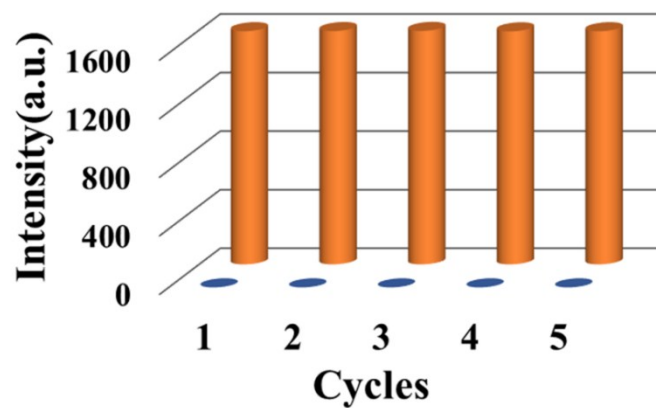

**Fig. S14** Photoluminescence intensity of complex **2** in five recyclable experiments for the  $\text{Cr}_2\text{O}_7^{2-}$  in aqueous solution.

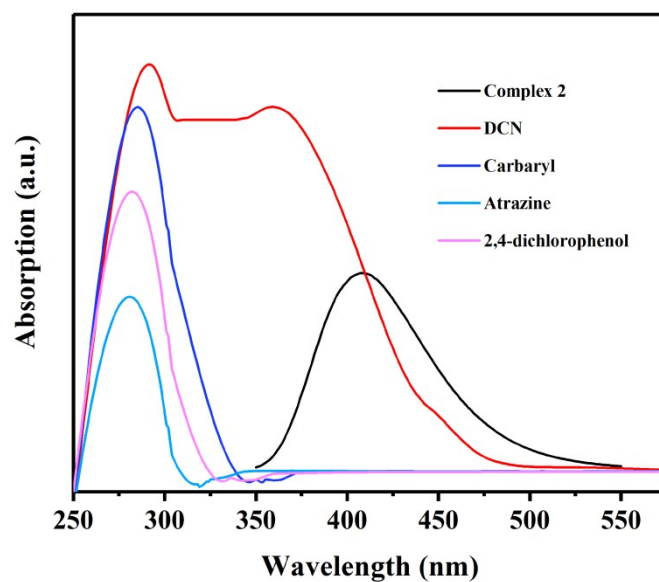

**Fig. S15** UV-Vis absorption spectra of various pesticides (0.01 M) DMF solution. The emission spectra of complex **2** (black color) (2 mg) dispersed in DMF (2 mL) upon excitation of 280 nm.

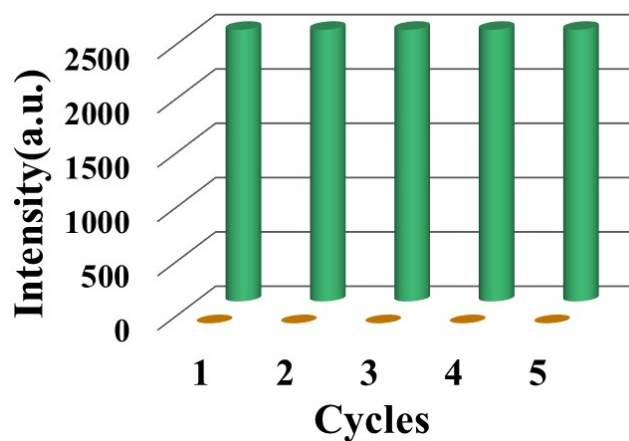

**Fig. S16** Photoluminescence intensity of complex **2** in five recyclable experiments for the DCN in DMF solution.
